# Supplementary material for: Synthesis of ultrathin two-dimensional organic–inorganic hybrid perovskite nanosheets for polymer field-effect transistors
Source: Royal Society of Chemistry journal article supplement (doi:10.1039/c8tc00289d), 2018-01-01
Supplement: c8tc00289d1.pdf [file c8tc00289d1.pdf]

## Supporting Information

### **Synthesis of Ultrathin Two-Dimensional Organic-Inorganic Hybrid Perovskite Nanosheets for Polymer Field-Effect Transistors**

Lijie Zhu<sup>a</sup>, Huaye Zhang<sup>a</sup>, Qipeng Lu<sup>b</sup>, Yue Wang<sup>a</sup>, Zhenbo Deng<sup>\*a</sup>, Yufeng Hu<sup>\*a</sup>,  
Zhidong Lou<sup>a</sup>, Qihong Cui<sup>a</sup>, Yanbing Hou<sup>a</sup> and Feng Teng<sup>a</sup>

*<sup>a</sup>Key laboratory of Luminescence and Optical Information, Ministry of Education,  
Beijing JiaoTong University, Beijing 100044, China*

*<sup>b</sup>School of Materials Science and Engineering, Nanyang Technological University, 50  
Nanyang Avenue, Singapore 639798, Singapore.*

*\*Corresponding authors. Tel: +86-10-51684860; Fax: +86-10-51688018.*

*zbdeng@bjtu.edu.cn (Z. Deng) and yfhu@bjtu.edu.cn (Y. Hu)*

## **Experimental section**

### **Materials.**

Lead iodide ( $\text{PbI}_2$ , 99.9%), lead bromide ( $\text{PbBr}_2$ , 98%), lead chloride ( $\text{PbCl}_2$ , 98%), N, N-dimethylmethanamide (DMF, 99.8%), toluene (99.8%), triethylamine (TEA) were purchased from Alfa Aesar. Phenylethylammonium iodide (PEAI, 99%), phenylethylammonium bromide (PEABr, 99%) and phenylethylammonium chloride (PEACl, 99%) were purchased from Xi'an Polymer Light Technology Corp. PVP powder ( $M_w \sim 20000$ ), PVA powder ( $M_w \sim 30000-70000$ ), 4, 4'-(hexafluoroisopropylidene) diphthalic anhydride (HDA, 99%) and propylene glycol monomethyl ether acetate (PGMEA) were purchased from Sigma Aldrich. All the chemicals were used as received without further purification.

### **Synthesis of 2D $(\text{PEA})_2\text{PbX}_4$ ( $\text{X}=\text{Cl}, \text{Br}, \text{I}$ ) nanosheets (NSs).**

In a typical synthesis of  $(\text{PEA})_2\text{PbI}_4$  NSs, 0.1 mmol of PEAi and 0.05 mmol of  $\text{PbI}_2$  were dissolved in 1 mL of DMF to form a perovskite precursor solution. Then, 15  $\mu\text{L}$  of the perovskite precursor solution were quickly dropped into 10 mL of toluene under vigorous stirring. The  $(\text{PEA})_2\text{PbI}_4$  NSs were obtained after centrifugation at 7,000 rpm for 1 min. The  $(\text{PEA})_2\text{PbBr}_4$  and  $(\text{PEA})_2\text{PbCl}_4$  NSs were synthesized by using the same method. The perovskite precursors were changed to PEABr and  $\text{PbBr}_2$  for  $(\text{PEA})_2\text{PbBr}_4$  NSs and PEACl and  $\text{PbCl}_2$  for  $(\text{PEA})_2\text{PbCl}_4$  NSs, respectively.

### **Material characterization**

The X-ray diffraction (XRD) patterns were recorded by a Bruker D8 X-ray diffractometer with  $\text{Cu K}\alpha$  radiation ( $\lambda=1.5406\text{\AA}$ , 40 kV, 40 mA). Samples used for

TEM, SEM and AFM characterizations were prepared by dropping colloidal dispersion in toluene onto the amorphous carbon-coated copper grids, Si, and Si, respectively, and then naturally dried. Transmission electron microscopy (TEM) images were recorded on a JEM-1400. SEM and EDS mapping images were obtained by a Hitachi (S-4800) field emission scanning electron microscope. AFM (Cypher S, Asylum Research) was used to characterize the 2D perovskite NSs in tapping mode under ambient conditions. Fluorescence spectra were recorded on a Cary Eclipse spectrophotometer at the excitation wavelength of 365 nm. The UV-vis absorption spectra were taken on a Shimadzu UV-3101 PC spectrophotometer. All the liquid samples were tested using  $1 \times 1 \text{ cm}^2$  path length quartz cuvettes

### **Device fabrication**

The FETs were fabricated with a structure of bottom gate and bottom contact. The patterned indium tin oxide (ITO) coated glass substrates which act as the gate electrode were pre-cleaned with deionized water, acetone, and isopropanol in an ultrasonic bath for 15 min each. Subsequently, Polyvinyl alcohol (PVA) film and the surface modification layer of crosslinking poly (4-vinylphenol) (CL-PVP) were fabricated according to the literature.<sup>1,2</sup> Subsequently, the semiconductor films were fabricated by spin-coating the composite solutions of P3HT and  $(\text{PEA})_2\text{PbX}_4$  NSs ( $\text{X} = \text{Cl}, \text{Br}, \text{I}$ ) on the dielectric layer and annealing for 10 minutes at  $110^\circ\text{C}$ . The composite solution formed by dispersing the obtained  $(\text{PEA})_2\text{PbX}_4$  NSs ( $\text{X} = \text{Cl}, \text{Br}, \text{I}$ ) into the P3HT toluene solution which had pre-dissolved in toluene with a concentration of 2 mg/ml. Finally, the gold (Au) film was thermally evaporated on top of the films through a

shadow mask to make the top contact source-drain electrode (50 nm) under the high vacuum ( $5 \times 10^{-6}$  torr).

### **Device characterization**

Transistor electrical characterization was performed with a Keithley 4200SCS semiconductor parameter analyzer connected to a standard probe station setup at room temperature in the air. Capacitance measurements were carried out using a sandwich electrode configuration with an Agilent E4990A Impedance Analyzer for frequencies ranging between 100 Hz and 1MHz.

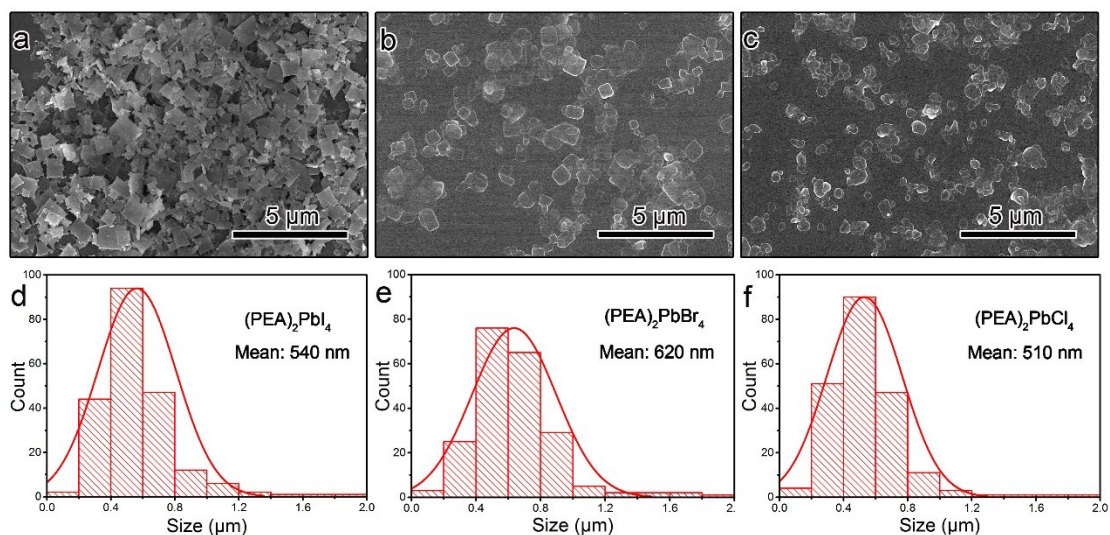

Figure S1. (a) SEM images and (d) the corresponding lateral size distribution of  $(\text{PEA})_2\text{PbI}_4$  NSs. (b) SEM images and (e) the corresponding lateral size distribution of  $(\text{PEA})_2\text{PbBr}_4$  NSs. (c) SEM images and (f) the corresponding lateral size distribution of  $(\text{PEA})_2\text{PbCl}_4$  NSs.

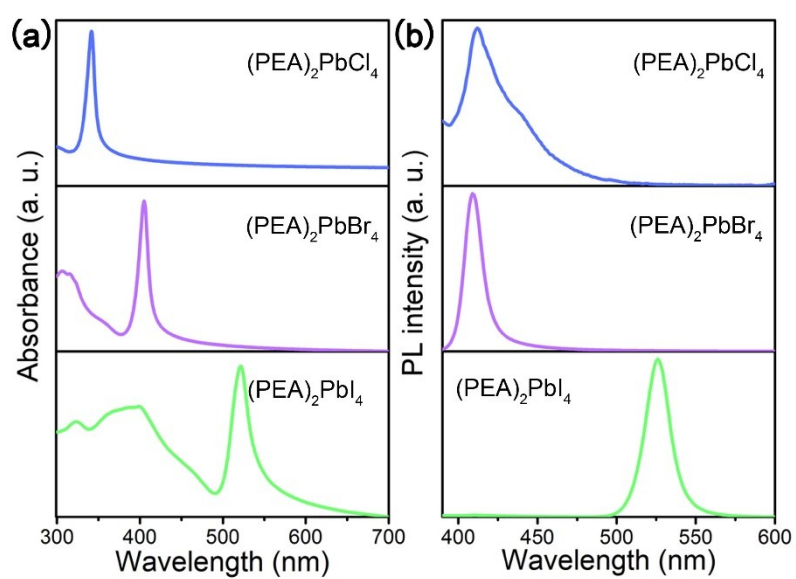

Figure S2. (a) UV/Vis absorption and (b) photoluminescence (PL) spectra of (PEA)<sub>2</sub>PbX<sub>4</sub> NSs (X= Cl, Br, I).

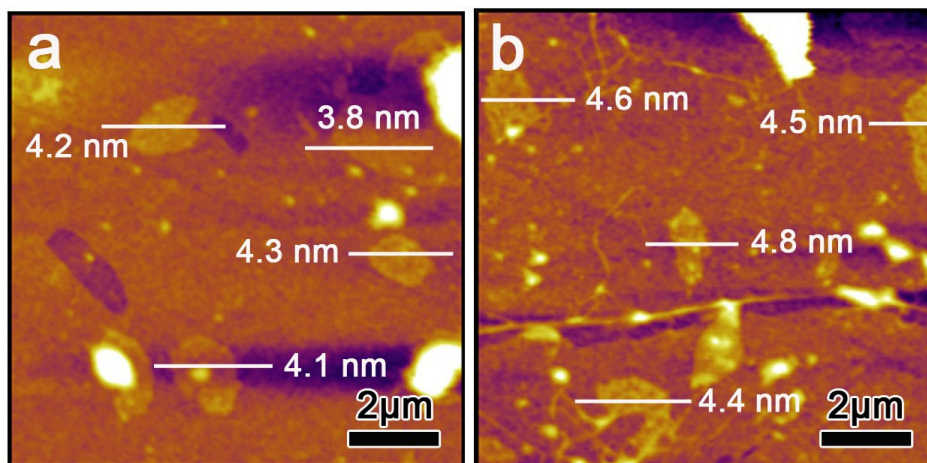

Figure S3. AFM height images and the corresponding thickness of the (a) (PEA)<sub>2</sub>PbBr<sub>4</sub> NSs and (b) (PEA)<sub>2</sub>PbCl<sub>4</sub> NSs.

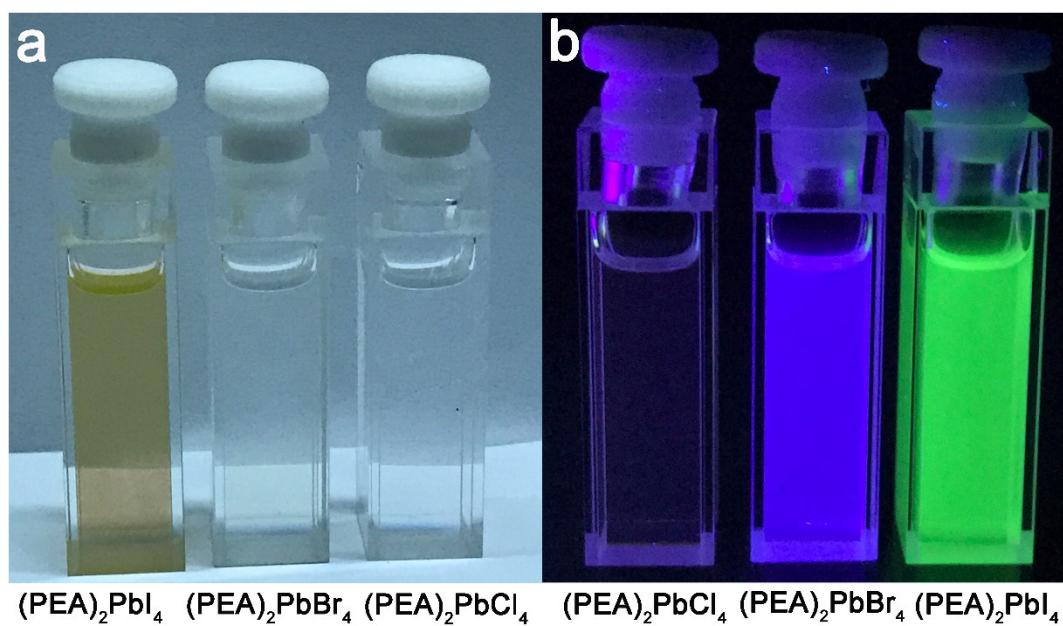

Figure S4. Photographs of (PEA)<sub>2</sub>PbX<sub>4</sub> NSs solutions (X= Cl, Br, I) (a) under the day light and (b) under the UV irradiation at 365 nm.

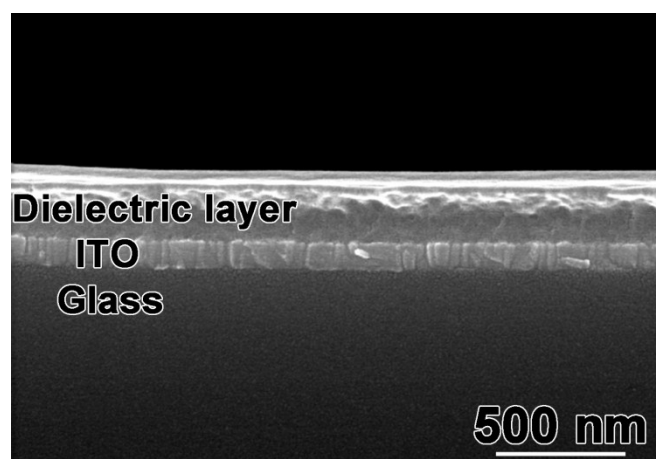

Figure S5. The cross-sectional SEM image of dielectric layer on ITO substrate.

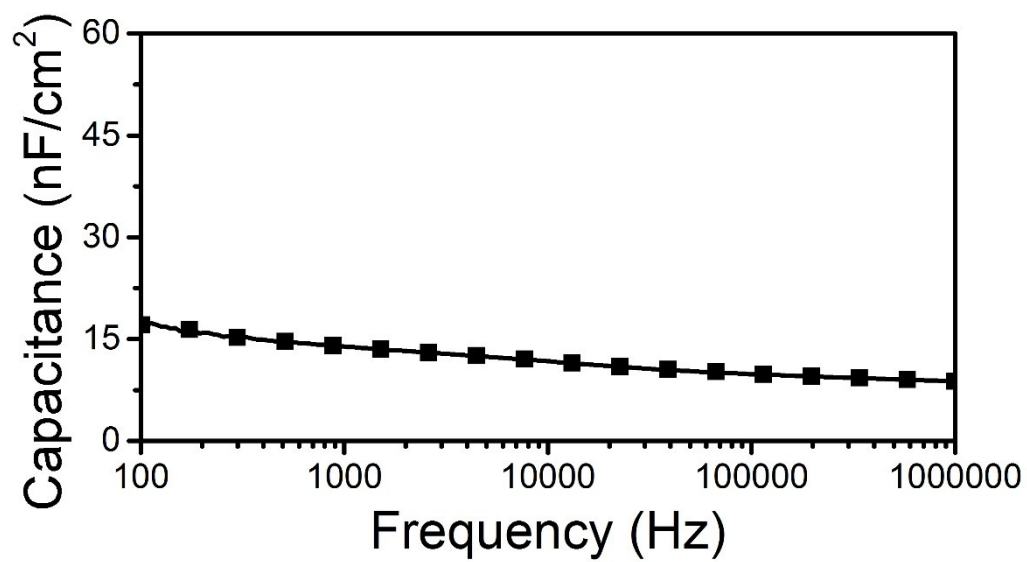

Figure S6. Capacitance vs frequency for characteristic with a capacitor area of 0.00125

cm<sup>2</sup>

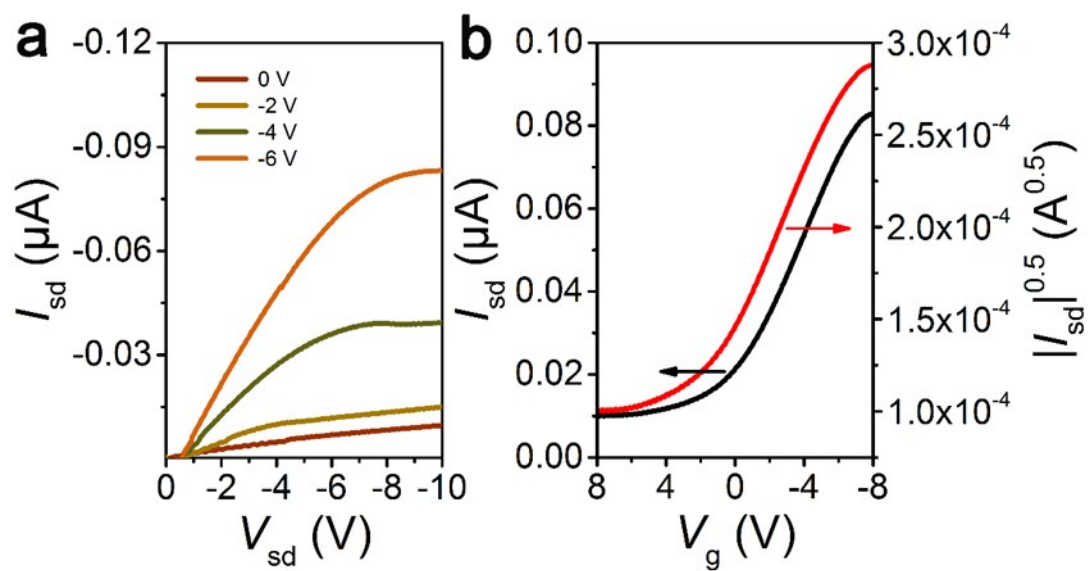

Figure S7. (a) Output and (b) transfer characteristics of a representative *p*-channel FET with P3HT.

## Reference

Stable

Low-

Bandga

p Pb—Sn

Binary  
Perovsk  
ites for  
Tandem

Solar  
Cells  
Stable  
Low-

Bandga

p Pb–Sn

Binary

Perovsk

ites for  
Tandem  
Solar  
Cells

Stable

Low-

Bandga

p Pb—Sn

Binary  
Perovsk  
ites for  
Tandem

# Solar Cells

1. T. B. Singh, F. Meghdadi, S. Günes, N. Marjanovic, G. Horowitz, P. Lang, S. Bauer and N. S. Sariciftci, *Adv. Mater.*, 2005, 17, 2315-2320.
2. M. E. Roberts, N. Queraltó, S. C. Mannsfeld, B. N. Reinecke, W. Knoll and Z. Bao, *Chem. Mater.*, 2009, 21, 2292-2299.
